# Supplementary material
Source: PubMed Central journal article supplement (PMC3474531)
Supplement: NIHMS407499-supplement-1_si_001.pdf [file NIHMS407499-supplement-1_si_001.pdf]

## Supplementary Data

### Selection of Virtual Screening Hits for Experimental Testing

The compounds from the virtual screen were chosen as follows:

- i. The compounds ranking 1-20 from the screen to structure with PDB code: 1t6b were chosen for experimental testing.
- ii. 17 of the top 150 scoring compounds from the screen to structure with PDB code 1tzo were chosen by eye based on their predicted interaction with E515 and K215 in the ligand binding pocket. Chemical clustering was used to ensure a diverse set of compounds was chosen.
- iii. 5 compounds were selected that were common in both screening hitlists (1t6b and 1tzo) but not selected in i or ii.

The ranking of the lead compounds in the hitlist from the screen to 1t6b and 1tzo are summarized in Supplementary Table 1.

|         | Rank in screen against PDB 1t6b | Rank in screen against PDB 1tzo |
|---------|---------------------------------|---------------------------------|
| 5181401 | 4                               | -                               |
| 5181385 | 10                              | 70                              |
| 5117235 | 16                              | -                               |
| 5180717 | 53                              | 198                             |

Supplementary Table 1: The ranking in the hitlist for each lead compound is shown. The active compounds ranked higher in the screen against the monomer PA structure 1t6b

### Purity of compounds

We requested data verifying the purity of the compounds that we purchased from ChemBridge Corporation, San Diego, CA. They provided us with spec sheets from a Nuclear Magnetic Resonance <sup>1</sup>H PMR spectra. Spectra are attached for the three compounds examined in this report. Compound 5181385 became unavailable after our initial tests, and purity data is not included for it. The company stated that these spectra demonstrated >95% purity (email attached).

However, since spectral data is not accepted as sufficient proof of purity, we tested the compounds ourselves using Reverse Phase HPLC (see attachments). To do this, we used a Waters 2695 Separation Module equipped with 2996 PDA detector. Analysis of chromatograms was done with *Empower* Software.

## Leppla, Stephen (NIH/NIAID) [E]

---

**From:** Chembridge Support <support@chembridge.com>  
**Sent:** Friday, April 27, 2012 12:42 PM  
**To:** Wein, Alexander (NIH/NIAID) [F]  
**Cc:** Leppla, Stephen (NIH/NIAID) [E]  
**Subject:** RE: Certificate of Analysis

Dear Alex,

According to our NMR spectra (attached), all 4 compounds are  $\geq 95\%$  pure.

Please note that there is apparently an error in the structure of ID 5117235 in our database. It is actually a free base, not a dihydrate. This should be fixed in the database soon.

If you have any questions, please feel free to contact me.

Sincerely,  
Max Strongin  
Manager, Customer Service  
ChemBridge Corporation  
11199 Sorrento Valley Rd., Ste 206  
San Diego, CA 92121  
Toll Free: (800) 964-6143 ext. 181  
Phone: (858) 451-7400 ext. 181  
Fax: (858) 451-7401

---

**From:** Wein, Alexander (NIH/NIAID) [F] [<mailto:alexander.wein@nih.gov>]  
**Sent:** Thursday, April 26, 2012 2:39 PM  
**To:** Chembridge Support  
**Cc:** Leppla, Stephen (NIH/NIAID) [E]  
**Subject:** Certificate of Analysis

Hello,

We purchased several small molecules (#'s 5117235, 5180717, 5181385, and 5181401) from your company and are trying to publish the results we obtained with these compounds. The journal requires proof of  $>95\%$  purity of all chemicals used in the manuscript, as well as  $^1\text{H}$  NMR and MS results. Does your company maintain records of this type or will we have to confirm the purity and identity of the purchased compounds?

Thanks,

Alex

-----  
Alexander Wein  
Microbial Pathogenesis Section  
Laboratory of Parasitic Diseases  
National Institute of Allergy and Infectious Diseases

/XXXX 181401X3.001

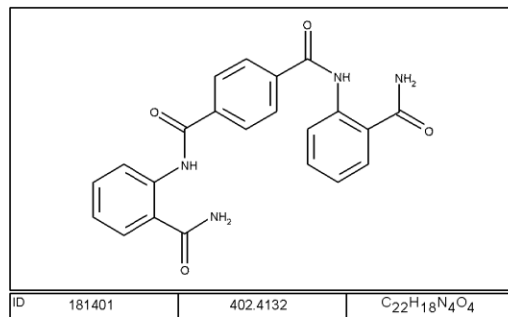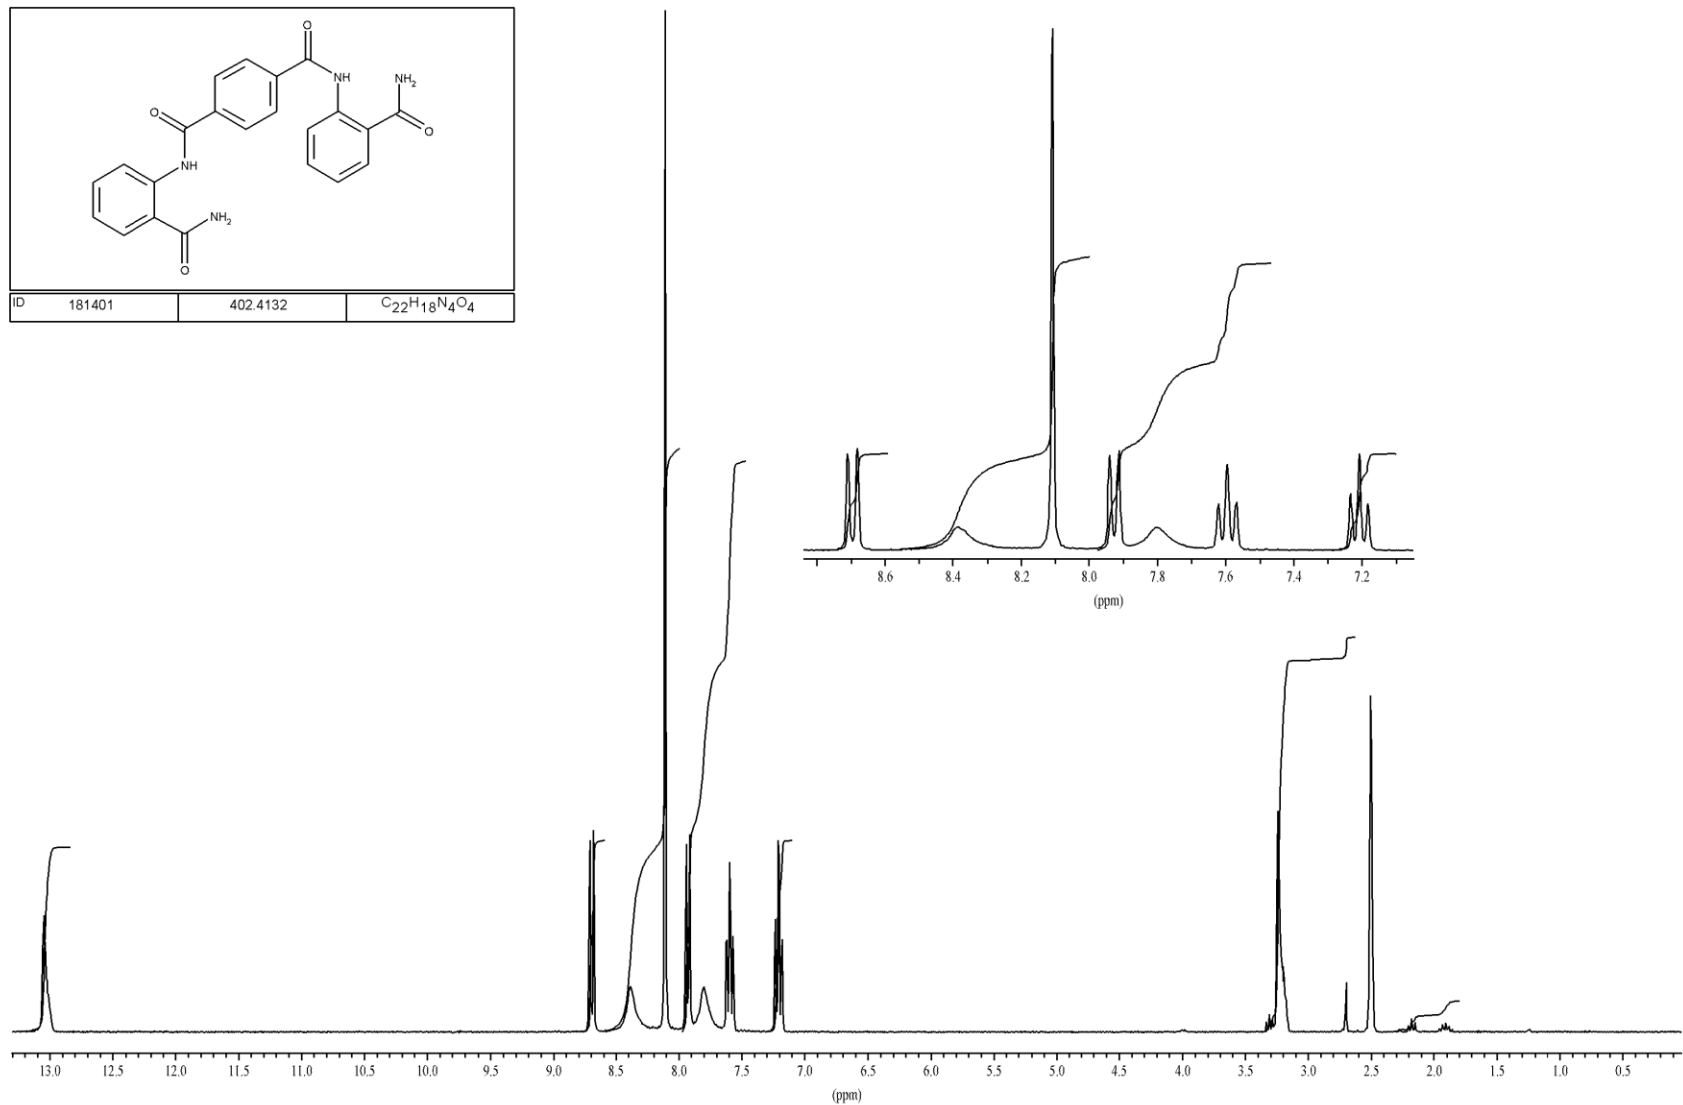

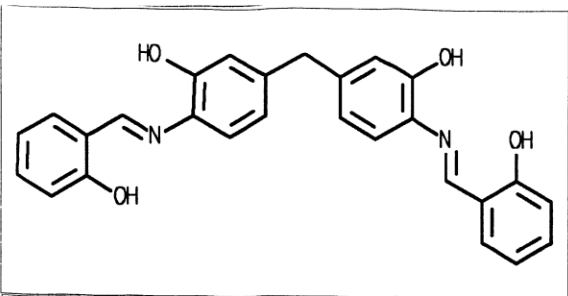

|           |               |        |
|-----------|---------------|--------|
| ID: 80717 | C27 H22 N2 O4 | 438.49 |
|-----------|---------------|--------|

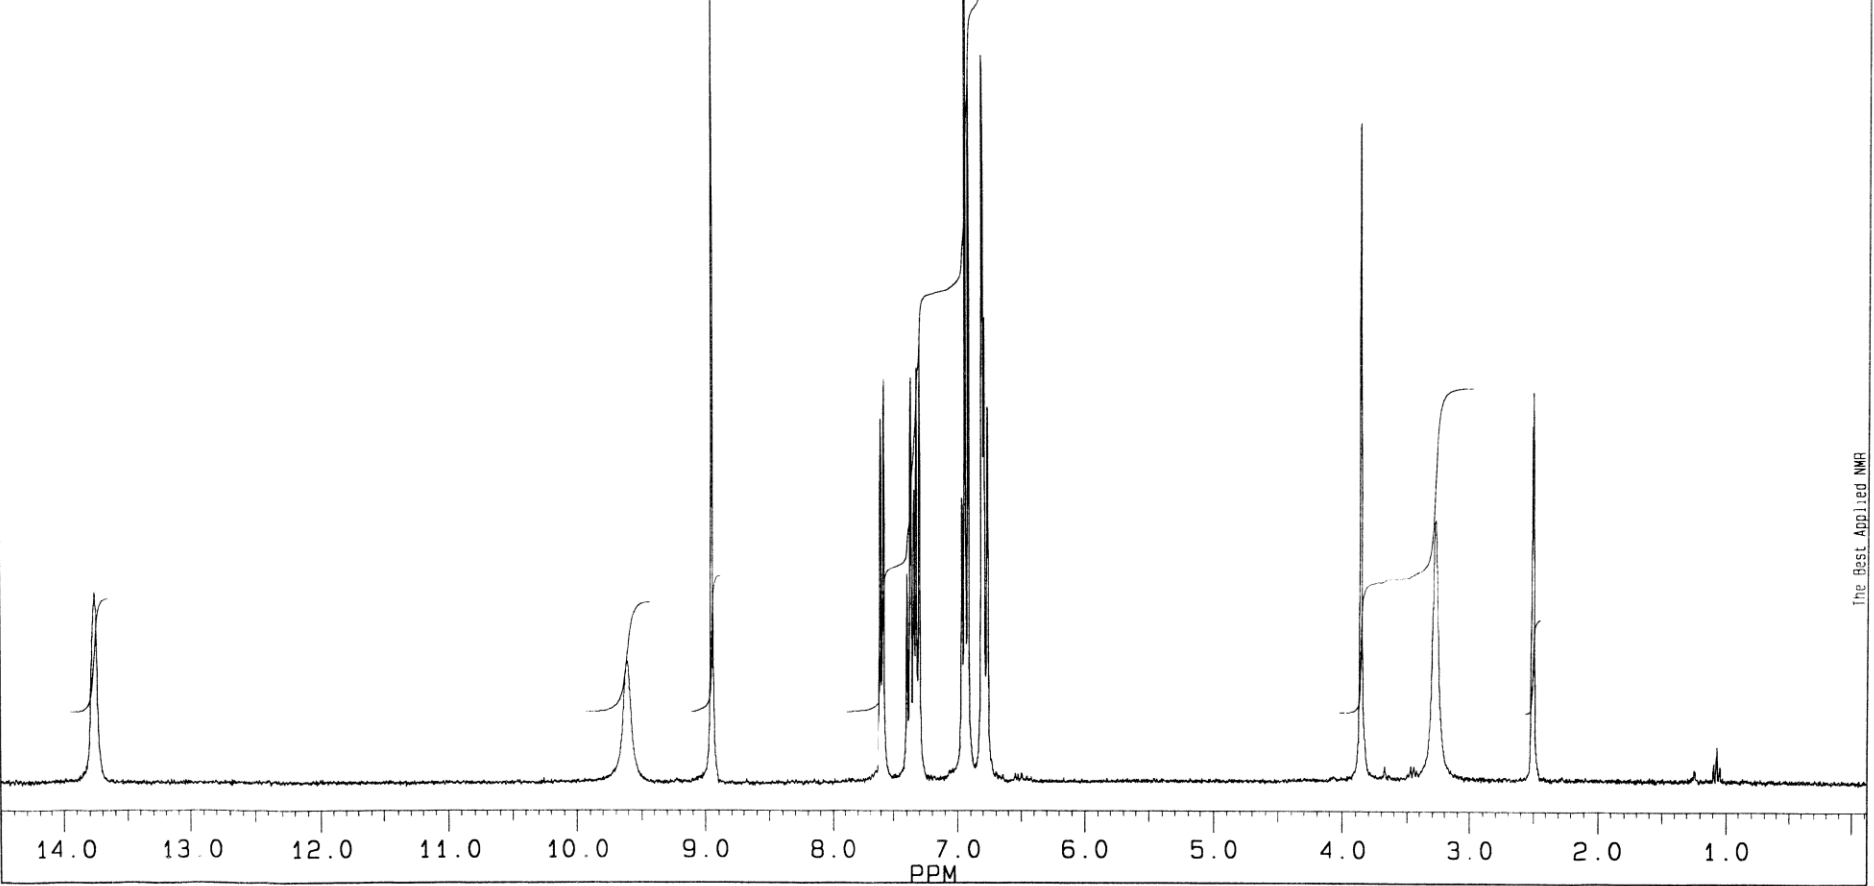

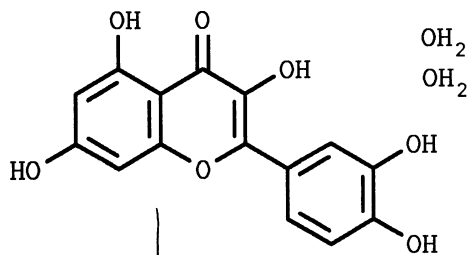

|          |            |        |
|----------|------------|--------|
| ID117235 | C15 H14 O9 | 338.27 |
|----------|------------|--------|

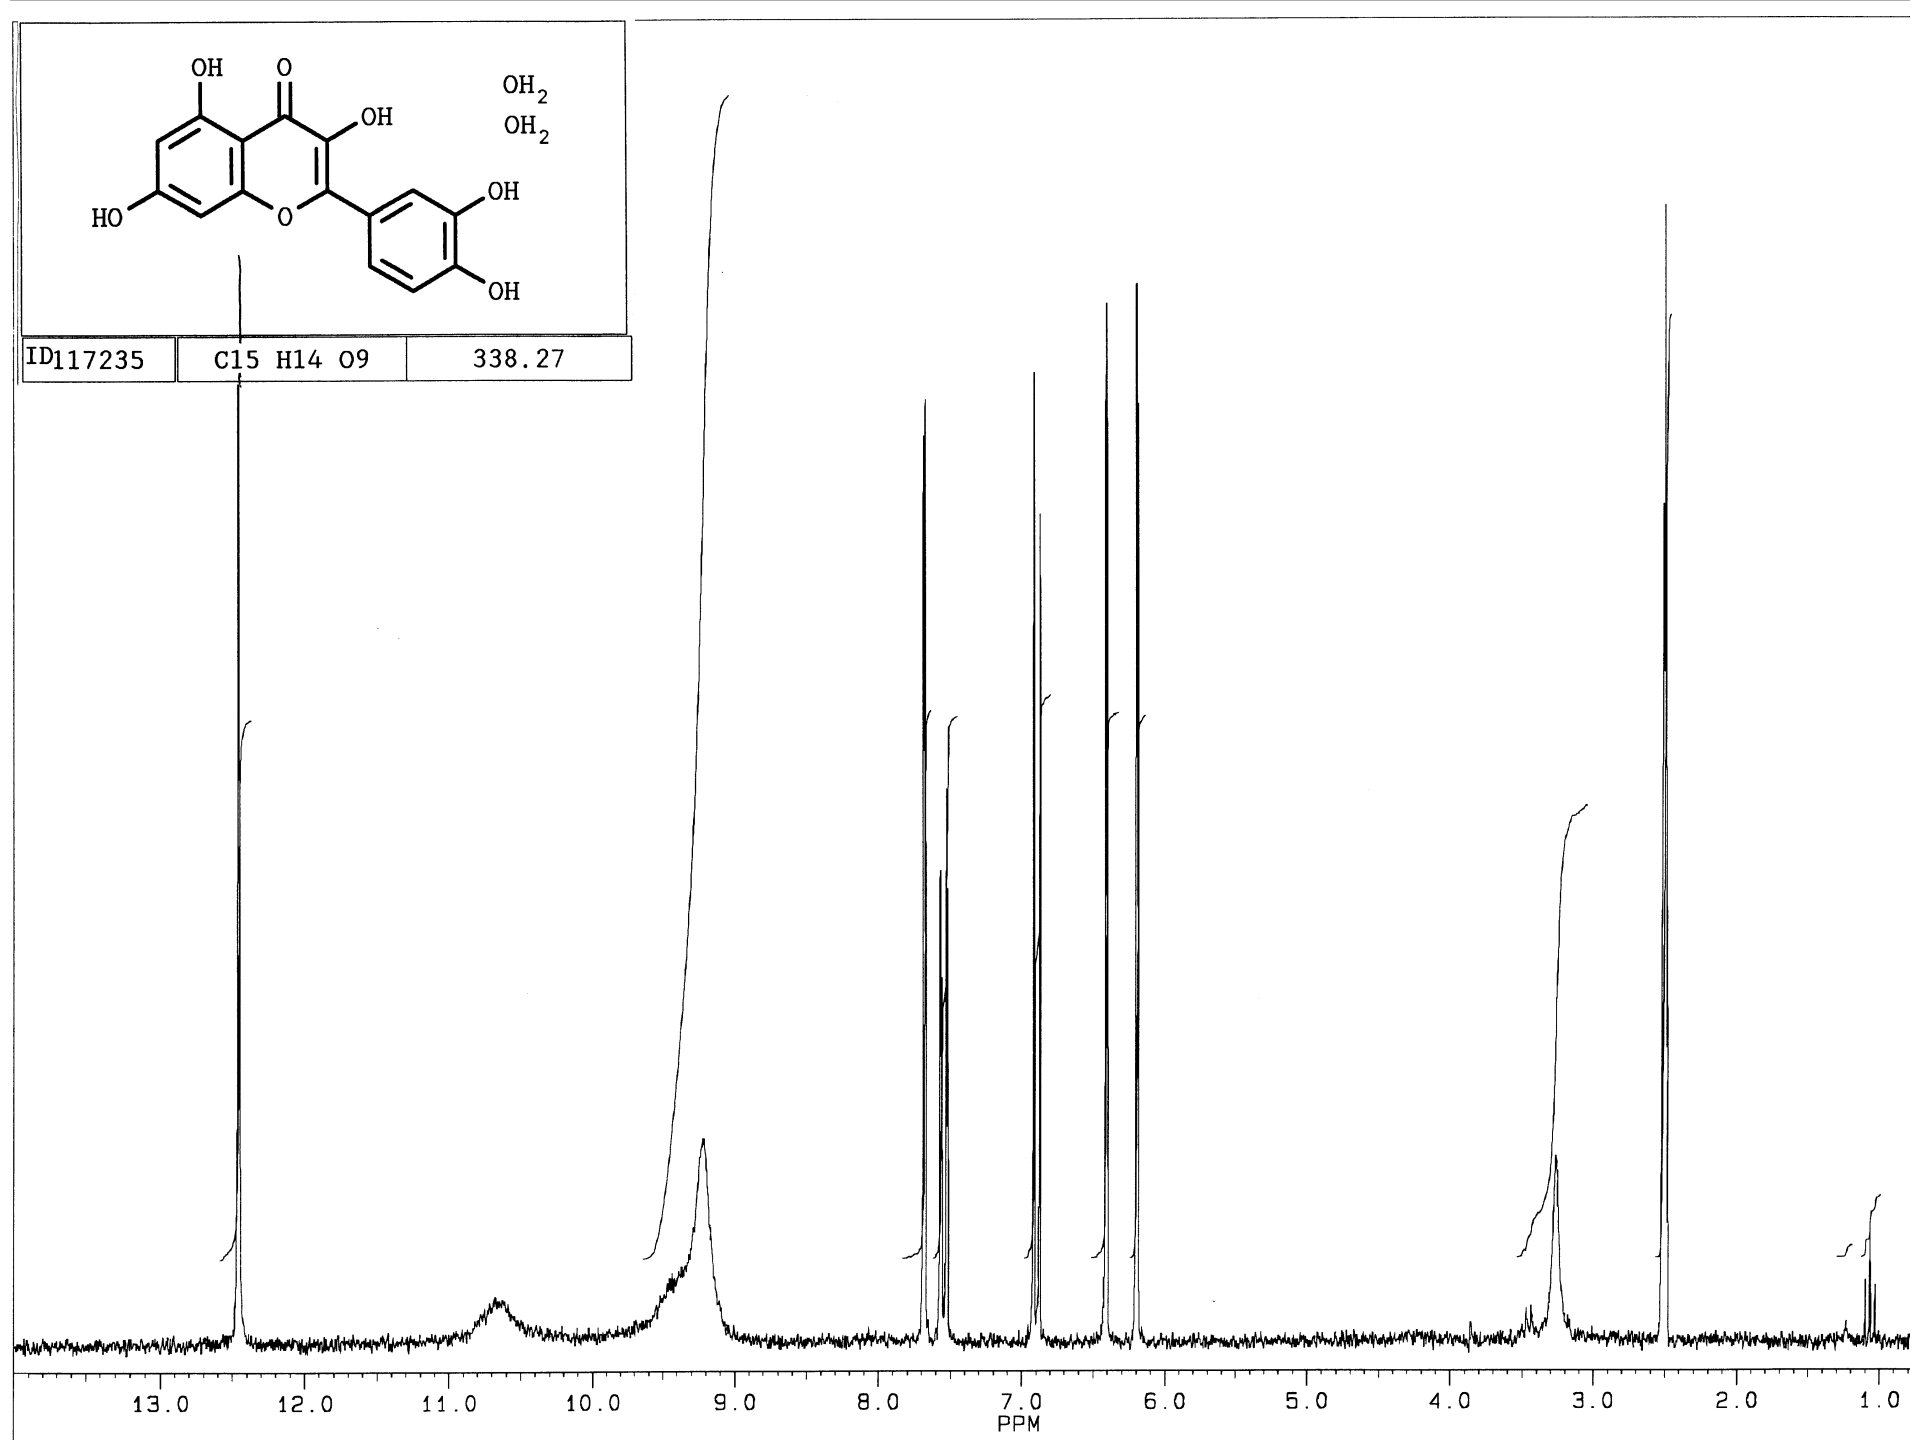

**Analysis of N,N'-bis[2-**  
**(aminocarbonyl)phenyl]terephthalamide**  
**(Chembridge #5181401)**

**Method:**

Column Agilent Eclipse XDB-C18, 150mm x 4.6mm I.D., 5µm particles

Mobile phase A: water with 0.1% acetic acid; B: acetonitrile

Gradient B: 0-30%, 20 min

Detection UV at 280nm

Injection: 5µl 10mM DMSO solution

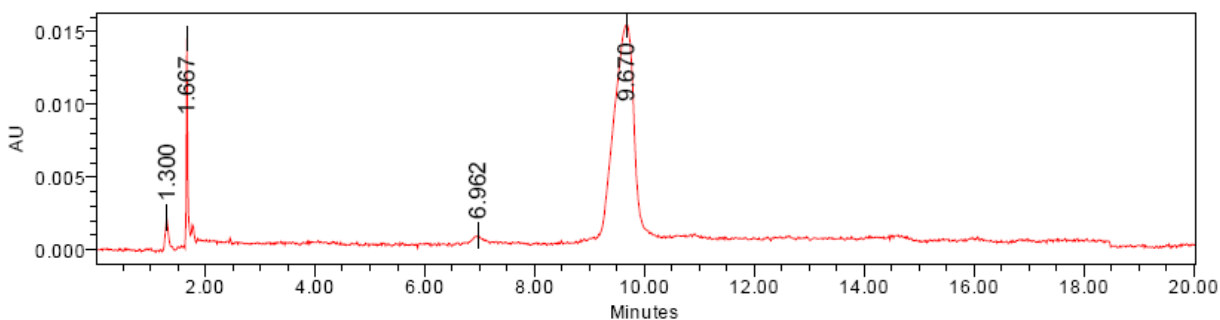

**Peak Results**

|   | Name           | RT           | Area          | % Area       |
|---|----------------|--------------|---------------|--------------|
| 1 |                | 1.300        | 1384          | 0.34         |
| 2 |                | 1.667        | 10963         | 2.72         |
| 3 |                | 6.962        | 1322          | 0.33         |
| 4 | <b>5181401</b> | <b>9.670</b> | <b>390050</b> | <b>96.61</b> |

# Analysis of 3,3'-methylenebis{6-[(2-hydroxybenzylidene)amino]phenol} (Chembridge #5180717)

## Method:

Column Agilent Eclipse XDB-C18, 150mm x 4.6mm I.D., 5µm particles

Mobile phase A: water; B: acetonitrile

Gradient B: 30-100%, 20 min

Flow rate 1 ml/min.

Detection UV at 280nm

Injection: 5µl 10mM DMSO solution.

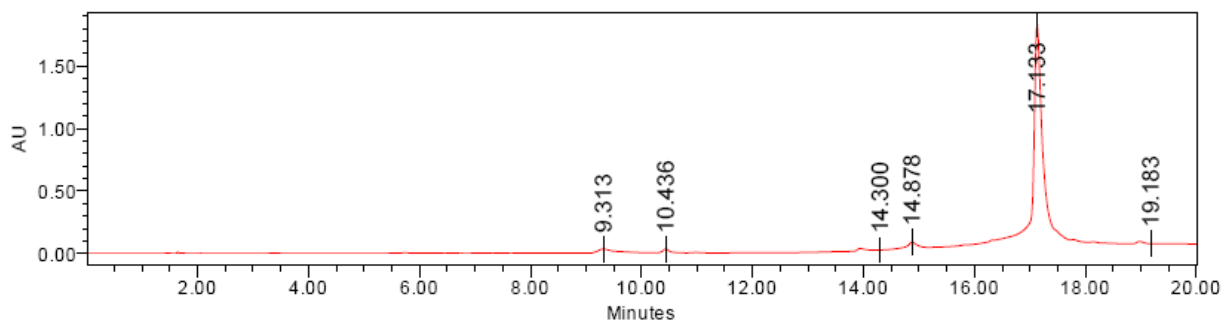

## Peak Results

|   | Name    | RT     | Area     | % Area |
|---|---------|--------|----------|--------|
| 1 |         | 9.313  | 398149   | 1.42   |
| 2 |         | 10.436 | 284104   | 1.01   |
| 3 |         | 14.300 | 146475   | 0.52   |
| 4 |         | 14.878 | 486755   | 1.73   |
| 5 | 5180717 | 17.133 | 26750742 | 95.17  |
| 6 |         | 19.183 | 42943    | 0.15   |

# Analysis of 2-(3,4-dihydroxyphenyl)-3,5,7-trihydroxy-4H-chromen-4-one dehydrate (Chembridge #5117235)

## Method:

Column Agilent Eclipse XDB-C18, 150mm x 4.6mm I.D., 5µm particles

Mobile phase A: water; B: acetonitrile

Gradient B: 0-30%, 20 min

Flow rate 1 ml/min

Detection UV at 260nm

Injection: 5µl 10mM DMSO solution

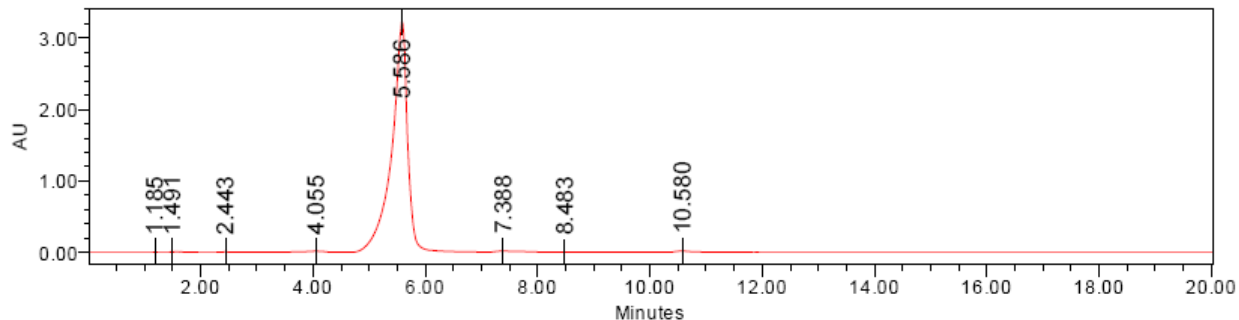

## Peak Results

|   | Name    | RT     | Area     | % Area |
|---|---------|--------|----------|--------|
| 1 |         | 1.185  | 36448    | 0.06   |
| 2 |         | 1.491  | 191520   | 0.29   |
| 3 |         | 2.443  | 162490   | 0.25   |
| 4 |         | 4.055  | 736997   | 1.12   |
| 5 | 5117235 | 5.586  | 63718572 | 96.54  |
| 6 |         | 7.388  | 697311   | 1.06   |
| 7 |         | 8.483  | 14250    | 0.02   |
| 8 |         | 10.580 | 445741   | 0.68   |
